# Supplementary material for: lncRNA AK141955 Acts as a ceRNA to Regulate Macrophage Polarization via the miR-124-3p/Sema6d Axis in Viral Myocarditis
Source: Research Square preprint supplement (doi:10.21203/rs.3.rs-684513/v1), 2021-07-13
Supplement: Supplementary file 1 [file 82b14d029158894bcd500d56.docx]

Qinghua Cui, 38 Xueyuan Rd, Department of Biomedical Informatics, Peking University Health Science Center, Beijing 100191, China Email: [cuiqinghua@hsc.pku.edu.cn](mailto:cuiqinghua@hsc.pku.edu.cn)；

Wei Hou, Email:houwei@whu.edu.cn, school of basic medical science，Wuhan  University；

Mingzhe Ma，Fudan University Shanghai Cancer Center，E-mail: mmz666@163.com
