# Supplementary material for: lncRNA AK141955 Acts as a ceRNA to Regulate Macrophage Polarization via the miR-124-3p/Sema6d Axis in Viral Myocarditis
Source: Research Square preprint supplement (doi:10.21203/rs.3.rs-684513/v1), 2021-07-13
Supplement: Supplementary file 2 [file efe6aac4a1614c5a2b5fdfea.xlsx]

## Sheet: NetWork_Edges
Node_Names	Node_type	Edges_Number
mmu-miR-3094-3p	miRNA-up	18
mmu-let-7f-1-3p	miRNA-up	15
mmu-miR-124-3p	miRNA-up	13
mmu-miR-448-3p	miRNA-up	6
mmu-miR-7b-5p	miRNA-up	5
mmu-miR-141-3p	miRNA-up	5
mmu-miR-33-3p	miRNA-up	5
mmu-miR-205-3p	miRNA-up	4
mmu-miR-465a-5p	miRNA-up	4
mmu-miR-3091-3p	miRNA-up	4
mmu-miR-2861	miRNA-up	4
mmu-miR-200b-3p	miRNA-up	4
mmu-miR-450a-2-3p	miRNA-up	4
Cpeb3	mRNA	4
mmu-miR-153-5p	miRNA-up	4
Nek6	mRNA	3
Shisa9	mRNA	3
mmu-miR-191-3p	miRNA-up	3
mmu-miR-1955-5p	miRNA-up	3
Inadl	mRNA	3
mmu-miR-363-5p	miRNA-up	3
Sat1	mRNA	3
Thrb	mRNA	3
mmu-miR-1953	miRNA-up	3
mmu-miR-204-5p	miRNA-up	3
Myh10	mRNA	3
mmu-miR-876-3p	miRNA-up	3
Tfeb	mRNA	2
Slc9a9	mRNA	2
Hecw1	mRNA	2
Tmod1	mRNA	2
mmu-miR-202-3p	miRNA-up	2
mmu-miR-3082-3p	miRNA-up	2
Ckap4	mRNA	2
1190002N15Rik	mRNA	2
Antxr2	mRNA	2
mmu-miR-551b-5p	miRNA-up	2
Nkain1	mRNA	2
Slc36a2	mRNA	2
Apbb2	mRNA	2
Hectd2	mRNA	2
mmu-miR-683	miRNA-up	2
Klf4	mRNA	2
Rgs7bp	mRNA	2
Cpeb2	mRNA	2
Arhgef4	mRNA	2
Zfp36l1	mRNA	2
Ppp1r3b	mRNA	2
mmu-miR-5626-5p	miRNA-up	2
Atxn7	mRNA	2
Gls	mRNA	2
3110047P20Rik	mRNA	2
Folr1	mRNA	2
mmu-miR-221-5p	miRNA-up	2
mmu-miR-3093-3p	miRNA-up	2
Atp8a1	mRNA	2
Epha5	mRNA	2
Eps8	mRNA	2
mmu-miR-691	miRNA-up	2
Lsm14a	mRNA	2
Lrrc32	mRNA	2
Dock5	mRNA	1
Dmxl1	mRNA	1
Hmx2	mRNA	1
mmu-miR-804	miRNA-up	1
Vangl1	mRNA	1
Gpd1	mRNA	1
mmu-miR-1930-5p	miRNA-up	1
mmu-miR-883a-3p	miRNA-up	1
Ccdc80	mRNA	1
Dcaf12l2	mRNA	1
Cd209e	mRNA	1
Etv4	mRNA	1
Ptchd1	mRNA	1
Pkp2	mRNA	1
Etl4	mRNA	1
mmu-miR-107-5p	miRNA-up	1
mmu-miR-544-3p	miRNA-up	1
Bhlhe40	mRNA	1
mmu-miR-410-3p	miRNA-up	1
Rasgrp3	mRNA	1
Serpinb8	mRNA	1
Inpp5a	mRNA	1
mmu-miR-432	miRNA-up	1
mmu-miR-453	miRNA-up	1
Arhgap25	mRNA	1
Raph1	mRNA	1
Rtn4rl1	mRNA	1
Slc7a11	mRNA	1
Rgl1	mRNA	1
Flrt2	mRNA	1
Ap2a2	mRNA	1
Wwp1	mRNA	1
mmu-miR-344d-2-5p	miRNA-up	1
Pdp1	mRNA	1
Scn8a	mRNA	1
Mboat2	mRNA	1
Gpr155	mRNA	1
mmu-miR-491-5p	miRNA-up	1
Tanc2	mRNA	1
mmu-miR-574-5p	miRNA-down	1
Tfrc	mRNA	1
Arhgef15	mRNA	1
Steap3	mRNA	1
Bmp2	mRNA	1
Wee1	mRNA	1
Fchsd2	mRNA	1
mmu-miR-421-3p	miRNA-up	1
Ehd4	mRNA	1
Jun	mRNA	1
Reps2	mRNA	1
Mitf	mRNA	1
Cd83	mRNA	1
mmu-miR-1298-3p	miRNA-up	1
mmu-miR-223-5p	miRNA-up	1
Smo	mRNA	1
Dip2b	mRNA	1
9430020K01Rik	mRNA	1
Emp2	mRNA	1
Deptor	mRNA	1
Cables1	mRNA	1
Arhgap26	mRNA	1
Hip1	mRNA	1
Fzd3	mRNA	1
Tecpr1	mRNA	1
Egr2	mRNA	1
Efr3b	mRNA	1
Inhbb	mRNA	1
mmu-miR-379-3p	miRNA-up	1
mmu-miR-381-3p	miRNA-up	1
Fnbp1	mRNA	1
mmu-miR-212-5p	miRNA-up	1
Sema6d	mRNA	1
Hs2st1	mRNA	1
Kcna4	mRNA	1
Tbxas1	mRNA	1
mmu-miR-344b-5p	miRNA-up	1
Rps6ka2	mRNA	1
Socs6	mRNA	1
Foxq1	mRNA	1
Wdr89	mRNA	1
mmu-miR-143-3p	miRNA-down	1
Fam129b	mRNA	1
Arap2	mRNA	1
8430419L09Rik	mRNA	1
Ank	mRNA	1
Ap1s3	mRNA	1
mmu-miR-33-5p	miRNA-up	1
Dpysl5	mRNA	1
mmu-miR-205-5p	miRNA-up	1
Fam198b	mRNA	1
Fzd4	mRNA	1
Cblb	mRNA	1
mmu-miR-291a-5p	miRNA-up	1
Il7r	mRNA	1
mmu-miR-291b-5p	miRNA-up	1
Sox7	mRNA	1
mmu-miR-3109-3p	miRNA-up	1
Mapk8ip1	mRNA	1
Ehmt1	mRNA	1
Oxr1	mRNA	1
Tacc2	mRNA	1
mmu-miR-3086-3p	miRNA-up	1
Rasgef1a	mRNA	1
Mcf2l	mRNA	1
mmu-miR-5617-3p	miRNA-up	1
mmu-miR-155-5p	miRNA-up	1
Cldn11	mRNA	1
Stap1	mRNA	1
Zcchc9	mRNA	1
Myc	mRNA	1
mmu-miR-880-3p	miRNA-up	1
